# Supplementary material for: LINC00673 rs11655237 C>T confers neuroblastoma susceptibility in Chinese population
Source: PubMed Central journal article supplement (PMC5803493; doi:10.1042/bsr20171667), 2018-02-08
Supplement: bsr20171667_Supp1.pdf [file bsr20171667_Supp1.pdf]

**Supplemental Table 1.** Frequency distribution of selected characteristics in neuroblastoma cases and cancer-free controls

| Variables              | Guangdong province |       |                     |       | Henan province        |                  |       |                     | Combined subjects |                       |                  |       |                     |       |                       |
|------------------------|--------------------|-------|---------------------|-------|-----------------------|------------------|-------|---------------------|-------------------|-----------------------|------------------|-------|---------------------|-------|-----------------------|
|                        | Cases<br>(N=275)   |       | Controls<br>(N=531) |       | <i>P</i> <sup>a</sup> | Cases<br>(N=118) |       | Controls<br>(N=281) |                   | <i>P</i> <sup>a</sup> | Cases<br>(n=393) |       | Controls<br>(n=812) |       | <i>P</i> <sup>a</sup> |
|                        | No.                | %     | No.                 | %     |                       | No.              | %     | No.                 | %                 |                       | No.              | %     | No.                 | %     |                       |
| Age range, month       | 0-132              |       | 0.07-156            |       | 0.229                 | 0-131.1          |       | 0.1-144.0           |                   | 0.484                 | 0-132            |       | 0.07-156            |       | 0.437                 |
| Mean ± SD              | 31.50±25.43        |       | 29.73±24.86         |       |                       | 46.24±29.98      |       | 44.97±33.23         |                   |                       | 35.92±27.68      |       | 35.01±28.94         |       |                       |
| <12                    | 70                 | 25.45 | 145                 | 27.31 |                       | 9                | 7.63  | 32                  | 11.39             |                       | 79               | 20.10 | 177                 | 21.80 |                       |
| 12-60                  | 177                | 64.36 | 313                 | 58.95 |                       | 76               | 64.41 | 179                 | 63.70             |                       | 253              | 64.38 | 492                 | 60.59 |                       |
| >60                    | 28                 | 10.18 | 73                  | 13.75 |                       | 33               | 27.97 | 70                  | 24.91             |                       | 61               | 15.52 | 143                 | 17.61 |                       |
| Gender                 |                    |       |                     |       | 0.510                 |                  |       |                     |                   | 0.196                 |                  |       |                     |       | 0.836                 |
| Female                 | 114                | 41.45 | 233                 | 43.88 |                       | 54               | 45.76 | 109                 | 38.79             |                       | 168              | 42.75 | 342                 | 42.12 |                       |
| Male                   | 161                | 58.55 | 298                 | 56.12 |                       | 64               | 54.24 | 172                 | 61.21             |                       | 225              | 57.25 | 470                 | 57.88 |                       |
| Clinical stages        |                    |       |                     |       |                       |                  |       |                     |                   |                       |                  |       |                     |       |                       |
| I                      | 54                 | 19.64 |                     |       |                       | 15               | 12.71 |                     |                   |                       | 69               | 17.56 |                     |       |                       |
| II                     | 62                 | 22.55 |                     |       |                       | 31               | 26.27 |                     |                   |                       | 93               | 23.66 |                     |       |                       |
| III                    | 49                 | 17.82 |                     |       |                       | 19               | 16.10 |                     |                   |                       | 68               | 17.30 |                     |       |                       |
| IV                     | 94                 | 34.18 |                     |       |                       | 49               | 41.53 |                     |                   |                       | 143              | 36.39 |                     |       |                       |
| 4s                     | 8                  | 2.91  |                     |       |                       | 3                | 2.54  |                     |                   |                       | 11               | 2.80  |                     |       |                       |
| NA                     | 8                  | 2.91  |                     |       |                       | 1                | 0.85  |                     |                   |                       | 9                | 2.30  |                     |       |                       |
| Sites of origin        |                    |       |                     |       |                       |                  |       |                     |                   |                       |                  |       |                     |       |                       |
| Adrenal gland          | 64                 | 23.27 |                     |       |                       | 89               | 75.42 |                     |                   |                       | 153              | 38.93 |                     |       |                       |
| Retroperitoneal region | 87                 | 31.64 |                     |       |                       | /                | /     |                     |                   |                       | 87               | 22.14 |                     |       |                       |
| Mediastinum            | 90                 | 32.73 |                     |       |                       | 19               | 16.10 |                     |                   |                       | 109              | 27.74 |                     |       |                       |
| Other region           | 26                 | 9.45  |                     |       |                       | 10               | 8.47  |                     |                   |                       | 36               | 9.16  |                     |       |                       |
| NA                     | 8                  | 2.91  |                     |       |                       | /                | /     |                     |                   |                       | 8                | 2.04  |                     |       |                       |

SD, standard deviation; NA, not available.

<sup>a</sup>Two-sided  $\chi^2$  test for distributions between neuroblastoma cases and cancer-free controls.
